# Supplementary material for: Synergistic passivation with multi-dentate 2,6-pyridinedicarboxylic acid for high-performance perovskite solar cells
Source: Royal Society of Chemistry journal article supplement (doi:10.1039/d3tc02414h), 2023-01-01
Supplement: d3tc02414h1.pdf [file d3tc02414h1.pdf]

## Support information

### Synergistic passivation with multi-dentate 2,6-pyridinedicarboxylic acid for high-performance perovskite solar cells

Yi-Lin Li,<sup>#</sup> Xing Liu,<sup>#</sup> Lei Jin, Jian Zhou\*, and Wensheng Fu\*

*Chongqing Key Laboratory of inorganic functional materials, College of chemistry, Chongqing normal university, Chongqing, 401331, P.R. China*

From the EIS data and the following equation, the defect state density of the device at different energies can be quantified:

$$C = -\frac{1}{\omega Z''}$$

$$N_t(E_\omega) = -\frac{V_{bi}}{eW} \frac{dC}{d\omega} \frac{\omega}{K_B T}$$

$$E_\omega = K_B T \ln\left(\frac{\omega_0}{\omega}\right)$$

Where C is the capacitance of the device,  $\omega$  is the angular frequency,  $Z''$  is the imaginary part of the impedance,  $N_t$  is the trap density, W is the depletion layer width, q is the elementary charge,  $K_B$  is the Boltzmann constant, T is the absolute temperature,  $\omega_0$  is the escape frequency ( $\approx 10^{11} \text{ s}^{-1}$ ), and  $E_\omega$  is the energy boundary.

The defect density of states ( $N_t$ ) can be calculated by using the following formula:

$$N_t = 2\varepsilon_r\varepsilon_0 V_{TFL}/eL^2$$

Where  $V_{TFL}$  is the defect filling limiting voltage,  $\varepsilon_0$  is the vacuum dielectric constant ( $8.854 \times 10^{-14} \text{ F/cm}$ ),  $\varepsilon_r$  is the relative dielectric constant of MAPbI<sub>3</sub> (21.2), q is electron charge ( $1.6 \times 10^{-19} \text{ C}$ ), and L is the thickness of perovskite film (about 353 nm).  $V_{TFL}$  can be found from the SCLC curve, and  $N_t$  can be calculated.

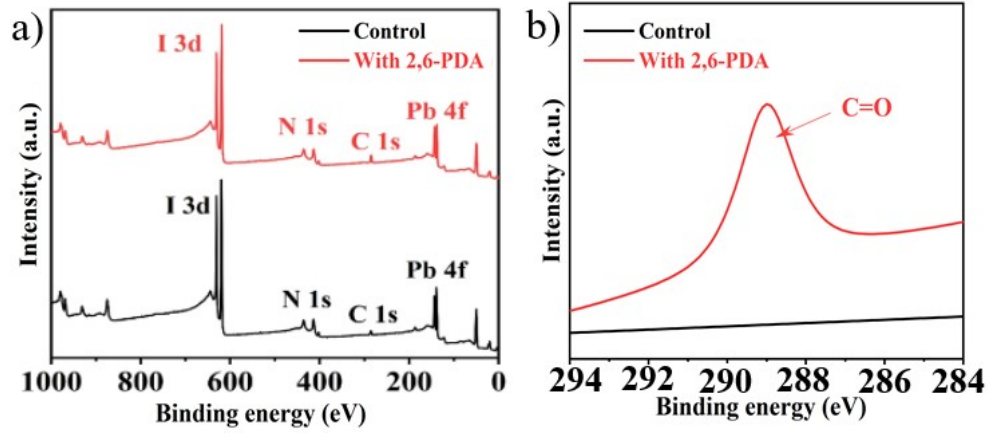

**Fig. S1.** a) XPS spectra of ITO/PTAA/MAPbI<sub>3</sub> and ITO/PTAA/MAPbI<sub>3</sub>/2,6-PDA films. b) XPS C = O spectra of ITO/PTAA/MAPbI<sub>3</sub> and ITO/PTAA/MAPbI<sub>3</sub>/2,6-PDA films.

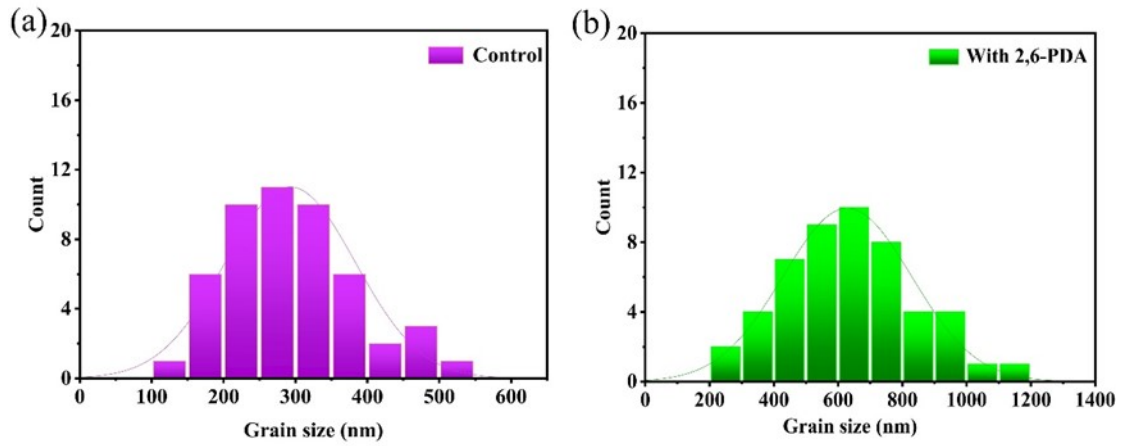

**Fig. S2.** The grain sizes of (a) ITO/PTAA/MAPbI<sub>3</sub> and (b) ITO/PTAA/MAPbI<sub>3</sub>/2,6-PDA films.

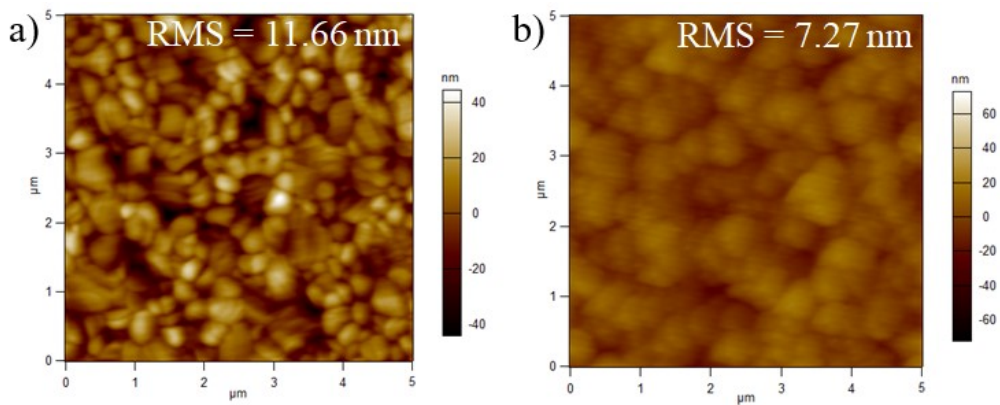

**Fig. S3.** The 2D AFM images of (a) ITO/PTAA/MAPbI<sub>3</sub> and (b) ITO/PTAA/MAPbI<sub>3</sub>/2,6-PDA films.

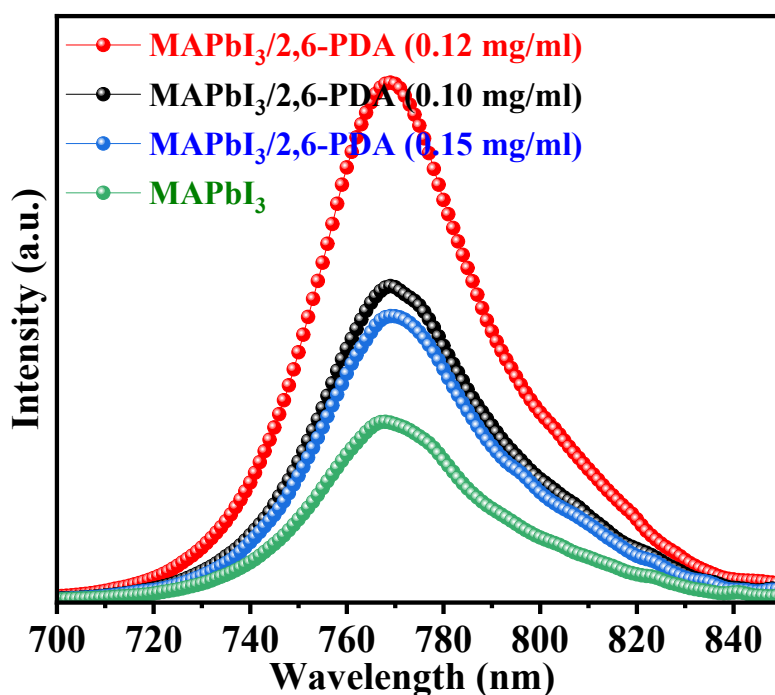

**Fig. S4** The PL emission of the quartz/MAPbI<sub>3</sub>/2,6-PDA film with the different 2,6-PDA concentration.

**Table S1.** Photovoltaic parameters of the device in different scanning directions

| Sample  | Direction | V <sub>oc</sub><br>(V) | J <sub>sc</sub><br>(mA/cm <sup>2</sup> ) | FF<br>(%) | PCE<br>(%) | HI   | Average<br>HI |
|---------|-----------|------------------------|------------------------------------------|-----------|------------|------|---------------|
| 2,6-PDA | Forward   | 1.10                   | 23.37                                    | 80.26     | 20.57      | 0.17 | 0.14          |
|         | Reverse   | 1.11                   | 23.31                                    | 79.24     | 20.50      |      |               |
|         | Forward   | 1.10                   | 21.83                                    | 81.58     | 19.64      | 0.10 |               |
|         | Reverse   | 1.11                   | 21.90                                    | 81.38     | 19.68      |      |               |
|         | Forward   | 1.11                   | 21.93                                    | 79.53     | 19.41      | 0.15 |               |
|         | Reverse   | 1.11                   | 21.99                                    | 79.45     | 19.47      |      |               |
| Control | Forward   | 1.10                   | 21.93                                    | 79.28     | 19.19      | 1.24 | 1.05          |
|         | Reverse   | 1.10                   | 21.92                                    | 77.64     | 18.72      |      |               |
|         | Forward   | 1.09                   | 21.80                                    | 76.51     | 18.21      | 0.84 |               |
|         | Reverse   | 1.09                   | 21.89                                    | 77.39     | 18.52      |      |               |
|         | Forward   | 1.09                   | 21.74                                    | 77.58     | 18.46      | 1.07 |               |
|         | Reverse   | 1.10                   | 21.57                                    | 79.91     | 18.86      |      |               |

**Table S2.** TRPL fitting parameters for different films

| Sample                           | $\tau_1$ (ns) | $A_1$ (%) | $\tau_2$ (ns) | $A_2$ (%) | $T_{ave}$ (ns) |
|----------------------------------|---------------|-----------|---------------|-----------|----------------|
| MAPbI <sub>3</sub>               | 6.42          | 26.67     | 16.70         | 73.33     | 15.43          |
| MAPbI <sub>3</sub> /2,6-PDA      | 6.74          | 23.63     | 19.69         | 76.37     | 18.45          |
| MAPbI <sub>3</sub> /PCBM         | 1.61          | 96.84     | 4.41          | 3.16      | 1.84           |
| MAPbI <sub>3</sub> /2,6-PDA/PCBM | 1.20          | 98.73     | 3.59          | 1.27      | 1.29           |

**Table S3.** EIS fitting parameters of control device and 2,6-PDA device

| Sample  | $R_s$ | $R_{rec}(\Omega)$ | CPE1                  | $R_{dr}(\Omega)$ | CPE2                  |
|---------|-------|-------------------|-----------------------|------------------|-----------------------|
| Control | 10.02 | 6870              | $4.63 \times 10^{-9}$ | 23339            | $4.11 \times 10^{-7}$ |
| 2,6-PDA | 12.90 | 10876             | $4.44 \times 10^{-9}$ | 26402            | $7.30 \times 10^{-7}$ |
